# Supplementary material for: Association of Gut Microbiota Enterotypes with Blood Trace Elements in Women with Infertility
Source: MDPI journal article supplement (doi:10.3390/nu14153195), 2022-08-04
Supplement: s1 [file s1]

**Supplemental Table S1.** Comparison of *Prevotella*-enterotype and *Bacteroides*-enterotype in the LL, NL and HL of the five whole blood trace elements among healthy control group.

| Trace Element | Status | Concentration (μmol/L) | <i>P</i> -enterotype (N) | <i>B</i> -enterotype (N) | χ <sup>2</sup> | <i>P</i> value |
|---------------|--------|------------------------|--------------------------|--------------------------|----------------|----------------|
| Cu            | LL     | <9.28                  | 6                        | 3                        | 2.532          | 0.281          |
|               | NL     | 9.28-21.81             | 97                       | 67                       |                |                |
|               | HL     | >21.81                 | 3                        | 6                        |                |                |
| Zn            | LL     | <75.76                 | 7                        | 2                        | 2.867          | 0.238          |
|               | NL     | 75.76-114.62           | 92                       | 72                       |                |                |
|               | HL     | >114.62                | 7                        | 2                        |                |                |
| Ca            | LL     | <1.42                  | 6                        | 2                        | 0.980          | 0.721          |
|               | NL     | 1.42-1.92              | 95                       | 71                       |                |                |
|               | HL     | >1.92                  | 5                        | 3                        |                |                |
| Mg            | LL     | <1.25                  | 4                        | 3                        | 1.654          | 0.498          |
|               | NL     | 1.25-1.69              | 100                      | 69                       |                |                |
|               | HL     | >1.69                  | 2                        | 4                        |                |                |
| Fe            | LL     | <7.92                  | 3                        | 4                        | 0.885          | 0.724          |
|               | NL     | 7.92-9.82              | 98                       | 68                       |                |                |
|               | HL     | >9.82                  | 5                        | 4                        |                |                |

*P*-enterotype, *Prevotella*-enterotype; *B*-enterotype, *Bacteroides*-enterotype; Cu, copper; Zn, zinc; Ca, calcium; Mg, magnesium; Fe, iron; LL, low levels group; NL, normal levels group; HL, high levels group. The Chi-square test and Fisher's exact test were used to compare categorical variables.

**Supplemental Table S2.** Description of the diet and baseline information in healthy control group categorized by whole blood iron status.

| Characteristic                 | Whole blood iron status |                      |                      | <i>P</i> value <sup>a</sup> | <i>P</i> value <sup>b</sup> | <i>P</i> value |
|--------------------------------|-------------------------|----------------------|----------------------|-----------------------------|-----------------------------|----------------|
|                                | LL                      | NL                   | HL                   |                             |                             |                |
| N (%)                          | 7                       | 166                  | 9                    |                             |                             |                |
| Log( <i>P/B</i> )              | -0.25 (-3.39, 0.57)     | -2.75 (-3.78, 0.06)  | -2.00 (-3.89, -0.18) | 0.497                       | 0.764                       | 0.478          |
| Age (year)                     | 34.00 (32.00, 34.00)    | 33.00 (30.00, 36.00) | 34.00 (29.00, 34.00) | 0.999                       | 0.624                       | 0.686          |
| BMI (kg/m <sup>2</sup> )       | 20.80 (18.1, 24.70)     | 22.30 (19.80, 25.40) | 21.70 (20.25, 24.70) | 0.536                       | 0.911                       | 0.575          |
| Diet in the last month (N)     |                         |                      |                      | 0.134                       | 0.085                       | 0.053          |
| A vegetarian diet              | 0                       | 5                    | 1                    |                             |                             |                |
| A meat-based diet              | 1                       | 3                    | 1                    |                             |                             |                |
| A meat and vegetarian diet     | 6                       | 158                  | 7                    |                             |                             |                |
| Drinking in the last month (N) |                         |                      |                      | 0.630                       | 0.087                       | 0.149          |
| None                           | 7                       | 137                  | 8                    |                             |                             |                |
| ≤3 times a month               | 0                       | 27                   | 0                    |                             |                             |                |
| >3 times a month               | 0                       | 2                    | 1                    |                             |                             |                |

LL, low levels group; NL, normal levels group; HL, high levels group; BMI, body mass index. Log(*P/B*), Log (*Prevotella/Bacteroides*). Median (interquartile range) is shown. The Kruskal–Wallis test was conducted for continuous variables, and the Chi-square test and Fisher's exact test were conducted for categorical variables.

<sup>a</sup>Comparing the LL and NL of whole blood iron after the post-hoc test.

<sup>b</sup>Comparing the HL and NL of whole blood iron after the post-hoc test.

**Supplemental Table S3.** Baseline characteristics of the study population according to enterotypes among RSA group.

|             | <i>P</i> -enterotype | <i>B</i> -enterotype | <i>P</i> value |
|-------------|----------------------|----------------------|----------------|
| Cu (μmol/L) | 14.96±3.00           | 16.59±3.91           | <b>0.027</b>   |
| Zn (μmol/L) | 90.04±8.71           | 95.33±12.42          | 0.059          |
| Ca (μmol/L) | 1.66±0.15            | 1.68±0.14            | 0.668          |
| Mg (μmol/L) | 1.46±0.14            | 1.48±0.13            | 0.440          |
| Fe (μmol/L) | 8.28±0.60            | 8.36±0.45            | <b>0.048</b>   |

RSA, recurrent spontaneous abortion; *P*-enterotype, *Prevotella*-enterotype; *B*-enterotype, *Bacteroides*-enterotype; Cu, copper; Zn, zinc; Ca, calcium; Mg, magnesium; Fe, iron; Mean ± standard deviation is shown. The Student's t test was used for continuous variables.

**Supplemental Table S4.** Baseline characteristics of the study population according to enterotypes among PCOS group.

|             | <i>P</i> -enterotype | <i>B</i> -enterotype | <i>P</i> value |
|-------------|----------------------|----------------------|----------------|
| Cu (μmol/L) | 15.56±2.88           | 16.34±3.59           | 0.437          |
| Zn (μmol/L) | 90.61±11.41          | 96.68±10.59          | <b>0.029</b>   |
| Ca (μmol/L) | 1.71±0.25            | 1.63±0.14            | 0.148          |
| Mg (μmol/L) | 1.50±0.13            | 1.51±0.11            | 0.879          |
| Fe (μmol/L) | 8.35±0.46            | 8.41±0.49            | 0.689          |

PCOS, polycystic ovarian syndrome; *P*-enterotype, *Prevotella*-enterotype; *B*-enterotype, *Bacteroides*-enterotype; Cu, copper; Zn, zinc; Ca, calcium; Mg, magnesium; Fe, iron; Mean ± standard deviation is shown. The Student's t test was used for continuous variables.

**Supplemental Table S5.** Baseline characteristics of the study population according to enterotypes among RIF group.

|             | <i>P</i> -enterotype | <i>B</i> -enterotype | <i>P</i> value |
|-------------|----------------------|----------------------|----------------|
| Cu (μmol/L) | 15.43±2.77           | 16.52±3.75           | 0.576          |
| Zn (μmol/L) | 92.27±11.30          | 93.96±10.97          | 0.636          |
| Ca (μmol/L) | 1.63±0.13            | 1.66±0.11            | 0.484          |
| Mg (μmol/L) | 1.45±0.11            | 1.49±0.12            | 0.245          |
| Fe (μmol/L) | 8.19±0.60            | 8.49±0.46            | 0.255          |

RIF, repeated implantation failure; *P*-enterotype, *Prevotella*-enterotype; *B*-enterotype, *Bacteroides*-enterotype; Cu, copper; Zn, zinc; Ca, calcium; Mg, magnesium; Fe, iron; Mean ± standard deviation is shown. The Student's t test was used for continuous variables.

**Supplemental Table S6.** Baseline characteristics of the study population according to enterotypes among DOR group.

|             | <i>P</i> -enterotype | <i>B</i> -enterotype | <i>P</i> value |
|-------------|----------------------|----------------------|----------------|
| Cu (μmol/L) | 14.74±3.01           | 15.81±2.73           | 0.543          |
| Zn (μmol/L) | 91.29±9.15           | 97.61±10.61          | <b>0.036</b>   |
| Ca (μmol/L) | 1.68±0.12            | 1.71±0.14            | 0.751          |

|             |           |           |              |
|-------------|-----------|-----------|--------------|
| Mg (μmol/L) | 1.42±0.06 | 1.48±0.15 | <b>0.023</b> |
| Fe (μmol/L) | 7.80±0.40 | 8.53±0.23 | <b>0.004</b> |

DOR, diminished ovarian reserve; *P*-enterotype, *Prevotella*-enterotype; *B*-enterotype, *Bacteroides*-enterotype; Cu, copper; Zn, zinc; Ca, calcium; Mg, magnesium; Fe, iron; Mean ± standard deviation is shown. The Student's t test was used for continuous variables.

**Supplemental Table S7.** Baseline characteristics of the study population according to enterotypes among tubal factor infertility/endometriosis group.

|             | <i>P</i> -enterotype | <i>B</i> -enterotype | <i>P</i> value |
|-------------|----------------------|----------------------|----------------|
| Cu (μmol/L) | 14.15±4.15           | 16.26±3.47           | 0.154          |
| Zn (μmol/L) | 93.48±11.82          | 99.78±10.13          | <b>0.042</b>   |
| Ca (μmol/L) | 1.60±0.14            | 1.70±0.16            | 0.462          |
| Mg (μmol/L) | 1.43±0.06            | 1.44±0.11            | 0.813          |
| Fe (μmol/L) | 7.99±0.46            | 8.94±0.50            | <b>0.011</b>   |

*P*-enterotype, *Prevotella*-enterotype; *B*-enterotype, *Bacteroides*-enterotype; Cu, copper; Zn, zinc; Ca, calcium; Mg, magnesium; Fe, iron; Mean ± standard deviation is shown. The Student's t test was used for continuous variables.

**Supplemental Table S8.** Baseline characteristics of the study population according to enterotypes among unexplained infertility group.

|             | <i>P</i> -enterotype | <i>B</i> -enterotype | <i>P</i> value |
|-------------|----------------------|----------------------|----------------|
| Cu (μmol/L) | 14.25±32.95          | 16.10±3.71           | 0.337          |
| Zn (μmol/L) | 90.27±8.17           | 94.90±9.59           | 0.332          |
| Ca (μmol/L) | 1.64±0.09            | 1.66±0.14            | 0.824          |
| Mg (μmol/L) | 1.45±0.08            | 1.47±0.12            | 0.637          |
| Fe (μmol/L) | 8.06±0.31            | 8.27±0.57            | 0.450          |

*P*-enterotype, *Prevotella*-enterotype; *B*-enterotype, *Bacteroides*-enterotype; Cu, copper; Zn, zinc; Ca, calcium; Mg, magnesium; Fe, iron; Mean ± standard deviation is shown. The Student's t test was used for continuous variables.

**Supplemental Table S9.** The primer and TaqMan probe sequences

|                    |                | Sequence                |
|--------------------|----------------|-------------------------|
| <i>Prevotella</i>  | Forward Primer | CCAGCCAAGTAGCGTGCA      |
|                    | Reverse Primer | TGGACCTTCCGTATTACCGC    |
| <i>Bacteroides</i> | Forward Primer | VGATGGGGATGCGTTCCATTAG  |
|                    | Reverse Primer | CATCCTTCACGCTACTTGGCTGG |
